# Supplementary material for: LC‐QTOF‐MS Analysis and Activity Profiles of Popular Antioxidant Dietary Supplements in Terms of Quality Control
Source: Hindawi journal article supplement (doi:10.1155/2017/8692516), 2017-01-01
Supplement: f2 [file 8692516.f2.pdf]

## Supplementary material

- 1
- 2
- 3
- 4
- 5
- 6
- 7
- 8
- 9
- 10
- 11
- 12
- 13
- 14
- 15
- 16

17 **Table S1. Antioxidant activity of dietary supplements.**

|            | ORAC (Trolox equivalents (μM)) |             |           | DPPH (Trolox equivalents (μM)) |             |           | ABTS (Trolox equivalents (μM)) |             |           | TPC (caffeic acid equivalents (mg)) |             |           |
|------------|--------------------------------|-------------|-----------|--------------------------------|-------------|-----------|--------------------------------|-------------|-----------|-------------------------------------|-------------|-----------|
|            | 1g of sample                   | Single dose | Dailydose | 1g of sample                   | Single dose | Dailydose | 1g of sample                   | Single dose | Dailydose | 1g of sample                        | Single dose | Dailydose |
| <b>S1</b>  | 321.16                         | 16.19       | 32.37     | 35.43                          | 1.79        | 3.57      | 110.31                         | 5.56        | 11.12     | 0.004645                            | 0.23412     | 0.468     |
| <b>S2</b>  | 709.27                         | 60          | 120.01    | 888.61                         | 75.18       | 150.35    | 1757.09                        | 148.65      | 297.3     | 0.131354                            | 11.11252    | 22.225    |
| <b>S3</b>  | 2152.03                        | 732.98      | 1465.97   | 1422.58                        | 484.53      | 969.06    | 1707.5                         | 581.57      | 1163.15   | 0.143195                            | 48.7723     | 97.545    |
| <b>S4</b>  | 562.02                         | 130.73      | 130.73    | 186.53                         | 43.39       | 43.39     | 401.35                         | 93.35       | 93.35     | 0.017553                            | 4.08292     | 4.083     |
| <b>S5</b>  | 4225.85                        | 758.12      | 758.12    | 2833.83                        | 508.39      | 508.39    | 1865.96                        | 334.75      | 334.75    | 0.365988                            | 65.65827    | 65.658    |
| <b>S6</b>  | 8603.54                        | 81.73       | 81.73     | 2829.6                         | 26.88       | 26.88     | 1823.88                        | 17.33       | 17.33     | 0.342579                            | 3.2545      | 3.255     |
| <b>S7</b>  | 569.42                         | 44.81       | 134.44    | 104.1                          | 8.19        | 24.58     | 247.95                         | 19.51       | 58.54     | 0.01614                             | 1.27022     | 3.811     |
| <b>S8</b>  | 142                            | 32.25       | 32.25     | 7.71                           | 1.75        | 1.75      | 31.43                          | 7.14        | 7.14      | 0.000485                            | 0.11013     | 0.11      |
| <b>S9</b>  | 1510.08                        | 169.28      | 169.28    | 919.57                         | 103.08      | 103.08    | 1128.56                        | 126.51      | 126.51    | 0.092319                            | 10.34899    | 10.349    |
| <b>S10</b> | 341.72                         | 60.48       | 362.9     | 13.21                          | 2.34        | 14.03     | 62.92                          | 11.14       | 66.82     | 0.004367                            | 0.7729      | 4.637     |
| <b>S11</b> | 13814.24                       | 2923.09     | 5846.19   | 9833.08                        | 2080.68     | 4161.36   | 1664.31                        | 352.17      | 704.33    | 0.706857                            | 149.57097   | 299.142   |
| <b>S12</b> | 1567.7                         | 594.32      | 594.32    | 194.53                         | 73.75       | 73.75     | 557.07                         | 211.19      | 211.19    | 0.034673                            | 13.14436    | 13.144    |
| <b>S13</b> | 429.29                         | 44.52       | 89.04     | 126.43                         | 13.11       | 26.22     | 177.87                         | 18.45       | 36.89     | 0.006789                            | 0.70399     | 1.408     |
| <b>S14</b> | 5513.39                        | 3431.54     | 3431.54   | 3484.45                        | 2168.72     | 2168.72   | 1800.39                        | 1120.56     | 1120.56   | 0.350137                            | 217.92517   | 217.925   |
| <b>S15</b> | 6471.51                        | 1851.5      | 3703      | 1647.46                        | 471.34      | 942.68    | 1736.17                        | 496.72      | 993.44    | 0.304618                            | 87.15131    | 174.303   |
| <b>S16</b> | 2196.36                        | 92.69       | 92.69     | 1410.6                         | 59.53       | 59.53     | 1905.01                        | 80.39       | 80.39     | 0.117284                            | 4.94938     | 4.949     |

18

19

20

21

22

23 **Table S2. The chemical composition of investigated dietary supplements**

| Sample | Compound                            | Rt (min) | Molecular formula                               | [M-H] <sup>-</sup> (m/z) | Fragment ions                          | Reference                                                                 |
|--------|-------------------------------------|----------|-------------------------------------------------|--------------------------|----------------------------------------|---------------------------------------------------------------------------|
| S1     | Curcumin                            | 44.9     | C <sub>21</sub> H <sub>20</sub> O <sub>6</sub>  | 367.1172                 | 217.0497; 173.0599; 149.0601; 134.0364 | METLIN (database)                                                         |
|        | Demethoxycurcumin                   | 50.5     | C <sub>20</sub> H <sub>18</sub> O <sub>5</sub>  | 337.1051                 | 217.0490; 173.0595; 149.0601; 119.0493 | METLIN (database)                                                         |
|        | Bisdemthoxycurcumin                 | 51.5     | C <sub>19</sub> H <sub>16</sub> O <sub>4</sub>  | 307.0958                 | 187.0393; 143.0497; 119.0501           | METLIN (database)                                                         |
| S2     | Dihydroxybenzaldehyde               | 14.5     | C <sub>7</sub> H <sub>6</sub> O <sub>3</sub>    | 137.0251                 | 108.0220                               | METLIN (database)                                                         |
|        | 3-O-caffeoylquinic acid             | 17.0     | C <sub>16</sub> H <sub>18</sub> O <sub>9</sub>  | 353.0863                 | 191.0542; 179.0328; 135.0435           | (Clifford MN et al. 2006)                                                 |
|        | 5-O-caffeoylquinic acid             | 26.2     | C <sub>16</sub> H <sub>18</sub> O <sub>9</sub>  | 353.0808                 | 191.0518; 179.0316; 161.0233           | (Clifford MN, Knight S, Surucu B and Kuhnert N 2006)                      |
|        | 3-O-caffeoyl-1,5-quinolactone       | 37.1     | C <sub>16</sub> H <sub>16</sub> O <sub>8</sub>  | 335.0920                 | 161.0690; 135.0440                     | METLIN (database)                                                         |
|        | Rutin                               | 49.8     | C <sub>27</sub> H <sub>30</sub> O <sub>16</sub> | 609.1425                 | 300.0261                               | METLIN (database)                                                         |
| S3     | Epigallocatechin gallate            | 22.4     | C <sub>22</sub> H <sub>18</sub> O <sub>11</sub> | 457.0792                 | 305.0681; 169.0154; 125.0249           | (Wu C et al. 2012)                                                        |
|        | Gallic acid                         | 25.2     | C <sub>7</sub> H <sub>6</sub> O <sub>5</sub>    | 169.0128                 | 125.0232; 79.0188                      | (Wu C, Xu H, Héritier J and Andlauer W 2012)                              |
|        | Epicatechin gallate                 | 27.4     | C <sub>22</sub> H <sub>18</sub> O <sub>10</sub> | 441.0886                 | 289.0765; 169.0172; 125.0264           | (Wu C, Xu H, Héritier J and Andlauer W 2012)                              |
|        | Apigenin glucuronide isomer         | 29.4     | C <sub>21</sub> H <sub>18</sub> O <sub>1</sub>  | 445.0806                 | 269.0488; 175.0296                     | (He L et al. 2016)                                                        |
|        | Apigenin glucuronide isomer         | 32.0     | C <sub>21</sub> H <sub>18</sub> O <sub>1</sub>  | 445.0841                 | 269.0514; 175.0282                     | (He L, Zhang Z, Lu L, Liu Y, Li S, Wang J, Song Z, Yan Z and Miao J 2016) |
|        | Methoxy apigenin glucuronide isomer | 32.9     | C <sub>22</sub> H <sub>21</sub> O <sub>2</sub>  | 459.1021                 | 283.0647; 268.0352; 175.0274           | METLIN (database)                                                         |
|        | Apigenin glucuronide isomer         | 33.5     | C <sub>21</sub> H <sub>18</sub> O <sub>1</sub>  | 445.0841                 | 269.0514; 175.0282                     | (He L, Zhang Z, Lu L, Liu Y, Li S, Wang J, Song Z, Yan Z and Miao J 2016) |
|        | Methoxy apigenin glucuronide isomer | 34.5     | C <sub>22</sub> H <sub>21</sub> O <sub>2</sub>  | 459.1021                 | 283.0647; 268.0352; 175.0274           | METLIN (database)                                                         |
|        | Apigenin                            | 44.1     | C <sub>15</sub> H <sub>10</sub> O <sub>5</sub>  | 269.0498                 | -                                      | (He L, Zhang Z, Lu L, Liu Y, Li S, Wang J, Song Z, Yan Z and Miao J       |

|             |                           |                                                |                                                 |                    |                                                  | 2016)                                                              |
|-------------|---------------------------|------------------------------------------------|-------------------------------------------------|--------------------|--------------------------------------------------|--------------------------------------------------------------------|
| S4          | Dihydroxybenzaldehyde     | 5.9                                            | C <sub>7</sub> H <sub>6</sub> O <sub>3</sub>    | 137.0251           | 108.0220                                         | METLIN (database)                                                  |
|             | Epicatechin               | 12.3                                           | C <sub>15</sub> H <sub>14</sub> O <sub>6</sub>  | 289.0716           | 245.0823; 205.0500; 125.0239                     | (Wu C, Xu H, Héritier J and Andlauer W 2012)                       |
|             | Quinic acid               | 15.5                                           | C <sub>7</sub> H <sub>12</sub> O <sub>6</sub>   | 191.0590           | 85.0317                                          | METLIN (database)                                                  |
|             | Catechin                  | 16.5                                           | C <sub>15</sub> H <sub>14</sub> O <sub>6</sub>  | 289.0712           | 245.0821; 205.0616; 125.0261                     | (Wu C, Xu H, Héritier J and Andlauer W 2012)                       |
|             | Kaempferol hexoside       | 26.7                                           | C <sub>21</sub> H <sub>20</sub> O <sub>11</sub> | 447.0960           | 285.0447                                         | METLIN (database)                                                  |
| S5          | Dihydroxybenzoic acid     | 4.7                                            | C <sub>7</sub> H <sub>6</sub> O <sub>4</sub>    | 153.0192           | 108.0228; 91.0204; 65.0019                       | METLIN (database)                                                  |
|             | Dihydroxybenzaldehyde     | 6.2                                            | C <sub>7</sub> H <sub>6</sub> O <sub>3</sub>    | 137.0247           | 108.0222; 92.0266                                | METLIN (database)                                                  |
|             | Epicatechin               | 12.5                                           | C <sub>15</sub> H <sub>14</sub> O <sub>6</sub>  | 289.0716           | 245.0823; 205.0500; 125.0239                     | (Wu C, Xu H, Héritier J and Andlauer W 2012)                       |
|             | Catechin                  | 32.1                                           | C <sub>15</sub> H <sub>14</sub> O <sub>6</sub>  | 289.0712           | 245.0821; 205.0616; 125.0261                     | (Wu C, Xu H, Héritier J and Andlauer W 2012)                       |
|             | A-type procyanidin trimer | 21.0                                           | C <sub>45</sub> H <sub>36</sub> O <sub>18</sub> | 863.1839           | 711.1351; 575.1207; 423.0724; 287.0558; 165.0149 | (Qiang L et al. 2015)                                              |
|             | Methyl gallate            | 23.1                                           | C <sub>8</sub> H <sub>8</sub> O <sub>5</sub>    | 183.0313           | 139.0379; 95.0570                                | METLIN (database)                                                  |
|             | A-type procyanidin trimer | 23.7                                           | C <sub>45</sub> H <sub>36</sub> O <sub>18</sub> | 863.1839           | 711.1351; 575.1207; 423.0724; 287.0558; 165.0149 | (Qiang L, Luo F, Zhao X, Liu Y, Hu G, Sun C, Li X and Chen K 2015) |
|             | Proanthocyanidin A isomer | 26.4                                           | C <sub>30</sub> H <sub>24</sub> O <sub>12</sub> | 575.1048           | 539.0789; 449.0803; 289.0639; 245.0842; 125.0183 | (Qiang L, Luo F, Zhao X, Liu Y, Hu G, Sun C, Li X and Chen K 2015) |
|             | A-type procyanidin trimer | 27.8                                           | C <sub>45</sub> H <sub>36</sub> O <sub>18</sub> | 863.1839           | 711.1351; 575.1207; 423.0724; 287.0558; 165.0149 | (Qiang L, Luo F, Zhao X, Liu Y, Hu G, Sun C, Li X and Chen K 2015) |
|             | Proanthocyanidin A isomer | 28.6                                           | C <sub>30</sub> H <sub>24</sub> O <sub>12</sub> | 575.1048           | 539.0789; 449.0803; 289.0639; 245.0842; 125.0183 | (Qiang L, Luo F, Zhao X, Liu Y, Hu G, Sun C, Li X and Chen K 2015) |
|             | A-type procyanidin trimer | 29.9                                           | C <sub>45</sub> H <sub>36</sub> O <sub>18</sub> | 863.1839           | 711.1351; 575.1207; 423.0724; 287.0558; 165.0149 | (Qiang L, Luo F, Zhao X, Liu Y, Hu G, Sun C, Li X and Chen K 2015) |
| Resveratrol | 37.9                      | C <sub>14</sub> H <sub>12</sub> O <sub>3</sub> | 227.0707                                        | 185.0595; 143.0496 | (Gao F et al. 2016)                              |                                                                    |
| Quercetin   | 43.3                      | C <sub>15</sub> H <sub>10</sub> O <sub>7</sub> | 301.0373                                        | 178.9987; 151.0037 | (Sanchez-Rabaned F et al. 2003)                  |                                                                    |
| S6          | Hexose                    | 1.5                                            | C <sub>6</sub> H <sub>12</sub> O <sub>6</sub>   | 179.0572           | 161.0490; 101.0224; 89.0295                      | METLIN (database)                                                  |

|    |                           |      |                                                 |          |                                                            |                                                                                        |
|----|---------------------------|------|-------------------------------------------------|----------|------------------------------------------------------------|----------------------------------------------------------------------------------------|
|    | Gallic acid               | 2.6  | C <sub>7</sub> H <sub>6</sub> O <sub>5</sub>    | 169.0128 | 125.0232; 79.0188                                          | (Wu C, Xu H, Héritier J and Andlauer W 2012)                                           |
|    | Epicatechin               | 12.5 | C <sub>15</sub> H <sub>14</sub> O <sub>6</sub>  | 289.0716 | 245.0823; 205.0500; 125.0239                               | (Wu C, Xu H, Héritier J and Andlauer W 2012)                                           |
|    | Piceid                    | 26.6 | C <sub>20</sub> H <sub>22</sub> O <sub>8</sub>  | 389.1261 | 227.0720; 185.0553; 143.0514                               | METLIN (database)                                                                      |
|    | Catechin                  | 31.7 | C <sub>15</sub> H <sub>14</sub> O <sub>6</sub>  | 289.0712 | 245.0821; 205.0616; 125.0261                               | (Wu C, Xu H, Héritier J and Andlauer W 2012)                                           |
|    | Resveratrol               | 37.9 | C <sub>14</sub> H <sub>12</sub> O <sub>3</sub>  | 227.0716 | 185.0606; 143.0480                                         | (Gao F, Zhou T, Hu Y, Lan L, Heyden YV, Crommen J, Lu G and Fan G 2016)                |
|    | Resveratrol derivative    | 44.3 | C <sub>21</sub> H <sub>30</sub> O <sub>13</sub> | 489.1588 | 227.0715; 185.0605                                         | (Gao F, Zhou T, Hu Y, Lan L, Heyden YV, Crommen J, Lu G and Fan G 2016)                |
|    | Emodic acid               | 52.1 | C <sub>15</sub> H <sub>8</sub> O <sub>7</sub>   | 299.0173 | 255.0307; 227.0351; 211.0388; 183.0346; 155.0506           | METLIN (database)                                                                      |
|    | Physcion                  | 53.3 | C <sub>16</sub> H <sub>12</sub> O <sub>5</sub>  | 283.0615 | 268.0337; 240.0411                                         | (Gao F, Zhou T, Hu Y, Lan L, Heyden YV, Crommen J, Lu G and Fan G 2016)                |
|    | Emodin                    | 58.8 | C <sub>15</sub> H <sub>10</sub> O <sub>5</sub>  | 269.0458 | 240.0425; 225.0548; 210.0303; 197.0602; 182.0365; 171.0442 | (Gao F, Zhou T, Hu Y, Lan L, Heyden YV, Crommen J, Lu G and Fan G 2016)                |
| S7 | Citric acid               | 1.7  | C <sub>6</sub> H <sub>8</sub> O <sub>7</sub>    | 191.0203 | 111.0087; 87.0103; 67.0216                                 | METLIN (database)                                                                      |
|    | Dihydroxybenzoic acid     | 4.6  | C <sub>7</sub> H <sub>6</sub> O <sub>4</sub>    | 153.0197 | 108.0222, 91.0204; 65.0019                                 | METLIN (database)                                                                      |
|    | Coumaric acid             | 6.8  | C <sub>9</sub> H <sub>8</sub> O <sub>3</sub>    | 163.0425 | 119.0481                                                   | METLIN (database)                                                                      |
|    | Quinic acid               | 10.8 | C <sub>7</sub> H <sub>12</sub> O <sub>6</sub>   | 191.0590 | 85.0317                                                    | METLIN (database)                                                                      |
|    | Shikimic acid             | 14.4 | C <sub>7</sub> H <sub>10</sub> O <sub>5</sub>   | 173.0456 | 137.8011; 111.0116; 93.0320                                | METLIN (database)                                                                      |
|    | Rutin                     | 27.4 | C <sub>27</sub> H <sub>30</sub> O <sub>16</sub> | 609.1425 | 300.0261                                                   | METLIN (database)                                                                      |
|    | Isoquercitrin             | 28.3 | C <sub>21</sub> H <sub>20</sub> O <sub>12</sub> | 463.0877 | 300.0238; 271.0247; 255.0295; 243.0284; 151.0051           | (Sanchez-Rabaned F, O., Lamuela-Raventos RM, Bastida J, Viladomat F and Codina C 2003) |
| S8 | Maltose                   | 1.9  | C <sub>12</sub> H <sub>22</sub> O <sub>11</sub> | 341.1124 | 221.0693; 179.0583, 161.0478; 143.0371; 119.0367; 101.0264 | METLIN (database)                                                                      |
|    | Maltohexaose              | 2.3  | C <sub>30</sub> H <sub>52</sub> O <sub>26</sub> | 989.3267 | 827.2736; 665.2195; 503.1656; 341.1123; 161.0477           | METLIN (database)                                                                      |
|    | Glucosyl hydroxycinnamate | 15.0 | C <sub>15</sub> H <sub>18</sub> O <sub>8</sub>  | 325.0992 | 163.0429; 145.0344                                         | (Bondia-Pons I et al. 2014)                                                            |

|    |                                 |      |                                                 |          |                              |                                                                                          |
|----|---------------------------------|------|-------------------------------------------------|----------|------------------------------|------------------------------------------------------------------------------------------|
|    | Coumaric acid                   | 15.9 | C <sub>9</sub> H <sub>8</sub> O <sub>3</sub>    | 163.0425 | 119.0481                     | (Bondia-Pons I, Savolainen O, Törrönen R, Martinez JA, Poutanen K and Hanhineva K 2014)b |
|    | Coumaric acid dihexoside        | 17.3 | C <sub>21</sub> H <sub>28</sub> O <sub>13</sub> | 487.1506 | 325.0975; 163.0421; 119.0483 | (Bondia-Pons I, Savolainen O, Törrönen R, Martinez JA, Poutanen K and Hanhineva K 2014)  |
|    | Coumaric acid hexoside          | 20.2 | C <sub>15</sub> H <sub>18</sub> O <sub>8</sub>  | 325.0975 | 163.0423; 119.0482           | (Bondia-Pons I, Savolainen O, Törrönen R, Martinez JA, Poutanen K and Hanhineva K 2014)  |
|    | Feruloylquinic acid trihexoside | 20.5 | C <sub>35</sub> H <sub>50</sub> O <sub>24</sub> | 853.4157 | 691.3594; 529.3096           | (Clifford MN, Knight S, Surucu B and Kuhnert N 2006)                                     |
|    | Citric acid                     | 21.9 | C <sub>6</sub> H <sub>8</sub> O <sub>7</sub>    | 191.0580 | 111.0102; 87.0117; 67.0168   | (Bondia-Pons I, Savolainen O, Törrönen R, Martinez JA, Poutanen K and Hanhineva K 2014)  |
|    | Rutin hexoside                  | 33.0 | C <sub>33</sub> H <sub>40</sub> O <sub>21</sub> | 771.2007 | 609.1506; 462.0858; 301.0379 | (Bondia-Pons I, Savolainen O, Törrönen R, Martinez JA, Poutanen K and Hanhineva K 2014)  |
| S9 | HHDP-hexoside                   | 1.9  | C <sub>20</sub> H <sub>18</sub> O <sub>14</sub> | 481.0655 | 301.0017; 275.0251; 229.0046 | (Brighenti V et al. 2016)                                                                |
|    | HHDP-hexoside                   | 2.2  | C <sub>20</sub> H <sub>18</sub> O <sub>14</sub> | 481.0637 | 301.0012, 275.0231; 229.0051 | (Brighenti V, Groothuis SF, Prencip FP, Amir R, Benvenuti S and Pellati F 2016)          |
|    | Gallagyl-hex (punicalin)        | 2.6  | C <sub>34</sub> H <sub>22</sub> O <sub>22</sub> | 781.0568 | 601.0013; 448.9772           | (Brighenti V, Groothuis SF, Prencip FP, Amir R, Benvenuti S and Pellati F 2016)          |
|    | Digalloyl-hexoside              | 5.4  | C <sub>20</sub> H <sub>20</sub> O <sub>14</sub> | 483.0802 | 331.0703; 313.0586; 169.0167 | (Brighenti V, Groothuis SF, Prencip FP, Amir R, Benvenuti S and Pellati F 2016)          |
|    | Gallic acid                     | 11.8 | C <sub>7</sub> H <sub>6</sub> O <sub>5</sub>    | 169.0128 | 125.0232; 79.0188            | (Wu C, Xu H, Héritier J and Andlauer W 2012)Wu 2012                                      |
|    | Ellagitannin                    | 16.3 | C <sub>24</sub> H <sub>14</sub> O <sub>15</sub> | 541.0369 | 301.026; 275.0221            | METLIN (database)                                                                        |
|    | Ellagitannin                    | 16.8 | C <sub>27</sub> H <sub>22</sub> O <sub>18</sub> | 633.0744 | 463.0521; 301.0021, 275.0240 | METLIN (database)                                                                        |
|    | Gallotannin                     | 22.6 | C <sub>27</sub> H <sub>24</sub> O <sub>18</sub> | 635.0903 | 483.0714; 331.0713; 169.0144 | METLIN (database)                                                                        |
|    | Rutin                           | 26.9 | C <sub>27</sub> H <sub>30</sub> O <sub>16</sub> | 609.1425 | 300.0261                     | METLIN (database)                                                                        |

|     |                                 |      |                                                               |          |                                                     |                                                      |
|-----|---------------------------------|------|---------------------------------------------------------------|----------|-----------------------------------------------------|------------------------------------------------------|
|     | Ellagic acid                    | 30.1 | C <sub>14</sub> H <sub>6</sub> O <sub>8</sub>                 | 300.0029 | 283.9937; 245.0045; 200.0136;<br>173.0249; 145.0305 | METLIN (database)                                    |
| S10 | Unidentified                    | 5.7  | C <sub>11</sub> H <sub>11</sub> N <sub>2</sub> O <sub>3</sub> | 218.0707 | 175.0635; 118.0289; 92.0287                         | -                                                    |
| S11 | Gallic acid                     | 4.0  | C <sub>7</sub> H <sub>6</sub> O <sub>5</sub>                  | 169.0128 | 125.0232; 79.0188                                   | (Wu C, Xu H, Héritier J and Andlauer W 2012)         |
|     | Gallocatechin                   | 8.9  | C <sub>15</sub> H <sub>14</sub> O <sub>7</sub>                | 305.0671 | 261.0762; 169.0359; 125.0244                        | (Wu C, Xu H, Héritier J and Andlauer W 2012)         |
|     | Epigallocatechin                | 13.3 | C <sub>15</sub> H <sub>14</sub> O <sub>7</sub>                | 305.0671 | 261.0762; 169.0359; 125.0244                        | (Wu C, Xu H, Héritier J and Andlauer W 2012)         |
|     | Epicatechin                     | 17.6 | C <sub>15</sub> H <sub>14</sub> O <sub>6</sub>                | 289.0716 | 245.0823; 205.0500; 125.0239                        | (Wu C, Xu H, Héritier J and Andlauer W 2012)         |
|     | Epigallocatechin gallate        | 21.9 | C <sub>22</sub> H <sub>18</sub> O <sub>11</sub>               | 457.0792 | 305.0681; 169.0154; 125.0249                        | (Wu C, Xu H, Héritier J and Andlauer W 2012)         |
|     | Gallocatechin gallate           | 24.5 | C <sub>22</sub> H <sub>18</sub> O <sub>11</sub>               | 457.0794 | 305.0665; 169.0160; 125.0264                        | (Wu C, Xu H, Héritier J and Andlauer W 2012)         |
|     | Epicatechin gallate             | 27.1 | C <sub>22</sub> H <sub>18</sub> O <sub>10</sub>               | 441.0886 | 289.0765; 169.0172; 125.0264                        | (Wu C, Xu H, Héritier J and Andlauer W 2012)         |
|     | Catechin gallate                | 29.6 | C <sub>22</sub> H <sub>18</sub> O <sub>10</sub>               | 441.0854 | 289.0744; 169.0163; 125.0260                        | (Wu C, Xu H, Héritier J and Andlauer W 2012)         |
| S12 | Ferulic acid                    | 23.2 | C <sub>10</sub> H <sub>10</sub> O <sub>4</sub>                | 193.0537 | 134.0396                                            | METLIN (database)                                    |
|     | 4-O-caffeoylquinic acid         | 24.7 | C <sub>16</sub> H <sub>18</sub> O <sub>9</sub>                | 353.0926 | 191.0518; 179.0315; 173.0451; 135.0473              | (Clifford MN, Knight S, Surucu B and Kuhnert N 2006) |
|     | 5-O-caffeoylquinic acid         | 25.9 | C <sub>16</sub> H <sub>18</sub> O <sub>9</sub>                | 353.0808 | 191.0518; 179.0316; 161.0233                        | (Clifford MN, Knight S, Surucu B and Kuhnert N 2006) |
|     | 5-O-feruloylquinic acid         | 34.6 | C <sub>17</sub> H <sub>20</sub> O <sub>9</sub>                | 367.1071 | 191.0591; 173.0477                                  | (Clifford MN, Knight S, Surucu B and Kuhnert N 2006) |
|     | Di-O-caffeoylquinic acid isomer | 51.9 | C <sub>25</sub> H <sub>24</sub> O <sub>12</sub>               | 515.1257 | 353.0910                                            | (Clifford MN, Knight S, Surucu B and Kuhnert N 2006) |
|     | Di-O-caffeoylquinic acid isomer | 53.3 | C <sub>25</sub> H <sub>24</sub> O <sub>12</sub>               | 515.1184 | 353.0083                                            | (Clifford MN, Knight S, Surucu B and Kuhnert N 2006) |
|     | Di-O-caffeoylquinic acid isomer | 54.1 | C <sub>25</sub> H <sub>24</sub> O <sub>12</sub>               | 515.1249 | 353.0930                                            | (Clifford MN, Knight S, Surucu B and Kuhnert N 2006) |

|     |                                             |      |                                                 |          |                                                  |                                                                                        |
|-----|---------------------------------------------|------|-------------------------------------------------|----------|--------------------------------------------------|----------------------------------------------------------------------------------------|
|     | O-dimethoxycinnamoyl, O-caffeoylquinic acid | 55.6 | C <sub>27</sub> H <sub>28</sub> O <sub>12</sub> | 543.1517 | 381.1180; 335.0900                               | (Jaiswal R et al. 2014)                                                                |
| S13 | Caffeoylquinic acid                         | 8.4  | C <sub>16</sub> H <sub>18</sub> O <sub>9</sub>  | 353.0863 | 191.0542;                                        | (Clifford MN, Knight S, Surucu B and Kuhnert N 2006)                                   |
|     | Quinic acid                                 | 11.9 | C <sub>7</sub> H <sub>10</sub> O <sub>6</sub>   | 191.0590 | 85.0317                                          | METLIN (database)                                                                      |
|     | Gallic acid                                 | 22.4 | C <sub>7</sub> H <sub>6</sub> O <sub>5</sub>    | 169.0128 | 125.0232; 79.0188                                | (Wu C, Xu H, Héritier J and Andlauer W 2012)Wu 2012                                    |
|     | Isoquercitrin                               | 28.9 | C <sub>21</sub> H <sub>20</sub> O <sub>12</sub> | 463.0877 | 300.0238; 271.0247; 255.0295; 243.0284; 151.0051 | METLIN (database)                                                                      |
|     | Rutin                                       | 37.3 | C <sub>27</sub> H <sub>30</sub> O <sub>16</sub> | 609.1425 | 300.0261                                         | METLIN (database)                                                                      |
| S14 | Gallic acid                                 | 2.6  | C <sub>7</sub> H <sub>6</sub> O <sub>5</sub>    | 169.0128 | 125.0232; 79.0188                                | (Wu C, Xu H, Héritier J and Andlauer W 2012)Wu 2012                                    |
|     | Gallocatechin                               | 4.1  | C <sub>15</sub> H <sub>14</sub> O <sub>7</sub>  | 305.0671 | 261,0762; 169.0359; 125.0244                     | (Wu C, Xu H, Héritier J and Andlauer W 2012)Wu 2012                                    |
|     | Epigallocatechin                            | 7.5  | C <sub>15</sub> H <sub>14</sub> O <sub>7</sub>  | 305.0671 | 261,0762; 169.0359; 125.0244                     | (Wu C, Xu H, Héritier J and Andlauer W 2012)Wu 2012                                    |
|     | Epicatechin                                 | 10.4 | C <sub>15</sub> H <sub>14</sub> O <sub>6</sub>  | 289.0716 | 245.0823; 205.0500; 125.0239                     | (Wu C, Xu H, Héritier J and Andlauer W 2012)Wu 2012                                    |
|     | Catechin                                    | 14.2 | C <sub>15</sub> H <sub>14</sub> O <sub>6</sub>  | 289.0712 | 245.0821; 205.0616; 125.0261                     | (Wu C, Xu H, Héritier J and Andlauer W 2012)Wu 2012                                    |
|     | Epigallocatechin gallate                    | 18.8 | C <sub>22</sub> H <sub>18</sub> O <sub>11</sub> | 457.0792 | 305.0681; 169.0154; 125.0249                     | (Wu C, Xu H, Héritier J and Andlauer W 2012)Wu 2012                                    |
|     | Gallocatechin gallate                       | 19.7 | C <sub>22</sub> H <sub>18</sub> O <sub>11</sub> | 457.0794 | 305.0665; 169.0160; 125.0264                     | (Wu C, Xu H, Héritier J and Andlauer W 2012)Wu 2012                                    |
|     | Epicatechin gallate                         | 21.4 | C <sub>22</sub> H <sub>18</sub> O <sub>10</sub> | 441.0886 | 289.0765; 169.0172; 125.0264                     | (Wu C, Xu H, Héritier J and Andlauer W 2012)Wu 2012                                    |
|     | Catechin gallate                            | 22.9 | C <sub>22</sub> H <sub>18</sub> O <sub>10</sub> | 441.0854 | 289.0744; 169.0163; 125.0260                     | (Wu C, Xu H, Héritier J and Andlauer W 2012)                                           |
|     | Quercitrin                                  | 26.7 | C <sub>21</sub> H <sub>20</sub> O <sub>11</sub> | 447.0979 | 301.0387                                         | (Sanchez-Rabaned F, O., Lamuela-Raventos RM, Bastida J, Viladomat F and Codina C 2003) |
|     | Myricetin                                   | 27.1 | C <sub>15</sub> H <sub>10</sub> O <sub>8</sub>  | 317.9351 | 179.0953; 151.9542                               | METLIN (database)                                                                      |



|     |                                       |      |                                                              |          |                                                  |                                                                                        |
|-----|---------------------------------------|------|--------------------------------------------------------------|----------|--------------------------------------------------|----------------------------------------------------------------------------------------|
|     | Resveratrol                           | 28.7 | C <sub>14</sub> H <sub>12</sub> O <sub>3</sub>               | 227.0716 | 185.0606; 143.0480                               | METLIN (database)                                                                      |
|     | Quercetin                             | 32.2 | C <sub>15</sub> H <sub>10</sub> O <sub>7</sub>               | 301.0373 | 178.9987; 151.0037                               | (Sanchez-Rabaned F, O., Lamuela-Raventos RM, Bastida J, Viladomat F and Codina C 2003) |
|     | Methoxyquercetin                      | 36.6 | C <sub>16</sub> H <sub>12</sub> O <sub>7</sub>               | 315.0537 | 301.0321; 178.0952, 151.0040                     | METLIN (database)                                                                      |
|     | Kaempferol                            | 37.9 | C <sub>15</sub> H <sub>10</sub> O <sub>7</sub>               | 285.0014 | 151.0043                                         | METLIN (database)                                                                      |
| S15 | Caffeic acid                          | 3.9  | C <sub>9</sub> H <sub>8</sub> O <sub>4</sub>                 | 179.0363 | 135.0465                                         | METLIN (database)                                                                      |
|     | Quinic acid                           | 4.7  | C <sub>7</sub> H <sub>12</sub> O <sub>6</sub>                | 191.0590 | 85.0317                                          | METLIN (database)                                                                      |
|     | Caffeine                              | 8.2  | C <sub>8</sub> H <sub>10</sub> N <sub>4</sub> O <sub>2</sub> | 193.0520 | 178.0253; 136.0455; 78.0636                      | (Wu C, Xu H, Héritier J and Andlauer W 2012)                                           |
|     | 4-O-caffeoylquinic acid               | 8.8  | C <sub>16</sub> H <sub>18</sub> O <sub>9</sub>               | 353.0926 | 191.0518; 179.0315; 173.0451; 135.0473           | (Clifford MN, Knight S, Surucu B and Kuhnert N 2006)                                   |
|     | Caffeoylquinic acid                   | 10.6 | C <sub>16</sub> H <sub>18</sub> O <sub>9</sub>               | 353.0863 | 191.0542;                                        | (Clifford MN, Knight S, Surucu B and Kuhnert N 2006)                                   |
|     | 5-O-caffeoylquinic acid               | 13.9 | C <sub>16</sub> H <sub>18</sub> O <sub>9</sub>               | 353.0808 | 191.0518; 179.0316; 161.0233                     | (Clifford MN, Knight S, Surucu B and Kuhnert N 2006)                                   |
|     | Shikimic acid                         | 16.1 | C <sub>7</sub> H <sub>10</sub> O <sub>5</sub>                | 173.0470 | 135.0450; 111.0461                               | METLIN (database)                                                                      |
|     | 5-O-feruloylquinic acid               | 18.0 | C <sub>17</sub> H <sub>20</sub> O <sub>9</sub>               | 367.1077 | 191.0580; 173.0473                               | (Clifford MN, Knight S, Surucu B and Kuhnert N 2006)                                   |
|     | Caffeoyl-1,5-quinolactone             | 30.3 | C <sub>16</sub> H <sub>16</sub> O <sub>8</sub>               | 335.0800 | 161.0260; 135.0310                               | METLIN (database)                                                                      |
|     | Di-O-caffeoylquinic acid isomer       | 28.5 | C <sub>25</sub> H <sub>24</sub> O <sub>12</sub>              | 515.1257 | 353.0912                                         | (Clifford MN, Knight S, Surucu B and Kuhnert N 2006)                                   |
|     | Di-O-caffeoylquinic acid isomer       | 30.2 | C <sub>25</sub> H <sub>24</sub> O <sub>12</sub>              | 515.1257 | 353.0911                                         | (Clifford MN, Knight S, Surucu B and Kuhnert N 2006)                                   |
|     | Caffeoyl-1,5-quinolactone derivative  | 30.9 | C <sub>20</sub> H <sub>26</sub> O <sub>9</sub>               | 409.1542 | 335.0800, 161.0260; 135.0310                     | METLIN (database)                                                                      |
|     | Di-O-caffeoylquinic acid isomer       | 31.9 | C <sub>25</sub> H <sub>24</sub> O <sub>12</sub>              | 515.1257 | 353.0910                                         | (Clifford MN, Knight S, Surucu B and Kuhnert N 2006)                                   |
|     | 3-O-feruloyl, 5-O-caffeoylquinic acid | 37.3 | C <sub>19</sub> H <sub>30</sub> O <sub>17</sub>              | 529.1356 | 367.1076; 335.0757; 179.0351; 161.0241; 135.0454 | (Clifford MN, Knight S, Surucu B and Kuhnert N 2006)                                   |
| S16 | Phloroglucinol                        | 3.9  | C <sub>6</sub> H <sub>6</sub> O <sub>3</sub>                 | 125.0268 | -                                                | METLIN (database)                                                                      |

|                        |      |                      |          |                                        |                                              |
|------------------------|------|----------------------|----------|----------------------------------------|----------------------------------------------|
| Epicatechin            | 26.0 | $C_{15}H_{14}O_6$    | 289.0716 | 245.0823; 205.0500; 125.0239           | (Wu C, Xu H, Héritier J and Andlauer W 2012) |
| Catechin               | 32.1 | $C_{15}H_{14}O_6$    | 289.0712 | 245.0821; 205.0616; 125.0261           | (Wu C, Xu H, Héritier J and Andlauer W 2012) |
| Epicatechin derivative | 36.4 | $C_{23}H_{32}O_{17}$ | 579.1559 | 469.1191; 289.0753; 245.0857; 125.0246 | (Wu C, Xu H, Héritier J and Andlauer W 2012) |
| Epicatechin derivative | 38.2 | $C_{23}H_{32}O_{17}$ | 579.1561 | 469.1185; 289.0756; 245.0857; 125.0248 | (Wu C, Xu H, Héritier J and Andlauer W 2012) |
| Epicatechin derivative | 40.4 | $C_{23}H_{32}O_{17}$ | 579.1560 | 469.1189; 289.0750; 245.0853; 125.0245 | (Wu C, Xu H, Héritier J and Andlauer W 2012) |

## References to the Table S2

- Abd El-Baky HH, El Baz FK, El-Baroty GS. 2008. Characterization of nutraceutical compounds in blue green alga *Spirulina Maxima*. *Journal of Medicinal Plants Research* 10:292-300.
- Bondia-Pons I, Savolainen O, Törrönen R, Martinez JA, Poutanen K, Hanhineva K. 2014. Metabolic profiling of Goji berry extracts for discrimination of geographical origin by non-targeted liquid chromatography-coupled to quadrupole time-of-flight mass spectrometry. *Food Research International*.63:132–138.
- Braga MEM, Leal PF, Carvalho OE, Meireles MAA. 2003. Comparison of yield, composition, and antioxidant activity of turmeric (*Curcuma longa* L.) extracts obtained using various techniques. *Journal of Agricultural and Food Chemistry*.51:6604-6611.
- Brighenti V, Groothuis SF, Prencip FP, Amir R, Benvenuti S, Pellati F. 2016. Metabolite fingerprinting of *Punica granatum* L. (pomegranate) polyphenols by means of high-performance liquid chromatography with diode array and electrospray ionization-mass spectrometry detection. *Journal of Chromatography A*.
- Clifford MN, Knight S, Surucu B, Kuhnert N. 2006. Characterization by LC-MSn of Four New Classes of Chlorogenic Acids in Green Coffee Beans: Dimethoxycinnamoylquinic Acids, Diferuloylquinic Acids, Caffeoyl-dimethoxycinnamoylquinic Acids, and Feruloyl-dimethoxycinnamoylquinic Acids. *Journal of Agricultural and Food Chemistry*.54:1957-1969.
- Database Name. Available from: <https://metlin.scripps.edu/index.php>.
- Embuscado ME. 2015. Spices and herbs: Natural sources of antioxidants – a mini review. *Journal of Functional Foods*.18:811-819.
- Gao F, Zhou T, Hu Y, Lan L, Heyden YV, Crommen J, Lu G, Fan G. 2016. Cyclodextrin-based ultrasonic-assisted microwave extraction and HPLC-PDA-ESI-IT-MSn separation and identification of hydrophilic and hydrophobic components of *Polygonum cuspidatum*: A green, rapid and effective process. *Industrial Crops and Products*.80:59–69.
- Ghimire BK, Seong ES, Kim EH, Ghimerey AK, Yu ChY, Ghimire BK, Chung IM. 2011. A comparative evaluation of the antioxidant activity of some medicinal plants popularly used in Nepal. *Journal of Medicinal Plants Research*.10:1884-1891.
- He L, Zhang Z, Lu L, Liu Y, Li S, Wang J, Song Z, Yan Z, Miao J. 2016. Rapid identification and quantitative analysis of the chemical constituents in *Scutellaria indica* L. by UHPLC–QTOF–MS and UHPLC–MS/MS. *Journal Of Pharmaceutical and Biomedical Analysis* 117:125-139.
- Henning SM, Zhang Y, Rontoyanni VG, Huang J, Lee RP, Trang A, Nuernberger G, Heber D. 2014. Variability in the antioxidant activity of dietary supplements from pomegranate, milk thistle, green tea, grape seed, goji, and acai: Effects of in vitro digestion. *Journal of Agricultural and Food Chemistry*.62:4313-4321.
- Huang D, Ou B, Hampsch-Woodill M, Flanagan J, Prior R. 2002. High-throughput assay of oxygen radical absorbance capacity (ORAC) using a multichannel liquid handling system coupled with a microplate fluorescence reader in 96-well format. *Journal of Agricultural and Food Chemistry*.50:4437-4444.
- Jaiswal R, Febi Matei M, Subedi P, Kuhner N. 2014. Does roasted coffee contain chlorogenic acid lactones or/and cinnamoylshikimate esters? *Food Research International*.61:214–227.
- Kratchanova M, Denev P, Ciz M, Lojek A, Mihailov A. 2010. Evaluation of antioxidant activity of medicinal plants containing polyphenol compounds. Comparison of two extraction systems. *Acta Biochimica Polonica*.2:229-234.
- Madrigal-Carballo S, Rodriguez G, Krueger CG, Dreher M, Reed JD. 2009. Pomegranate (*Punica granatum*) supplements: Authenticity, antioxidant and polyphenol composition. *Journal of Functional Foods*.1:324-329.
- Martin KR, Appel CL. 2010. Polyphenols as dietary supplements: A double-edged sword. *Nutrition and Dietary Supplements*.2:1-12.
- Medina MB. 2011. Determination of the total phenolics in juices and superfruits by a novel chemical method. *Journal of Functional Foods*.3:79-87.
- Meléndez NP, Nevárez-Moorillón V, Rodríguez-Herrera R, Espinoza JC, Aguilar CN. 2014. A microassay for quantification of 2,2-diphenyl-1-picrylhydrazyl (DPPH) free radical scavenging. *African Journal of Biochemistry Research*.8:14-18.
- Murillo E, Britton GB, Durant AA. 2012. Antioxidant activity and polyphenol content in cultivated and wild edible fruits grown in Panama. *Journal of Pharmacy And Bioallied Sciences*.4:313-317.
- Pérez D, Leighton F, Aspee A, Aliaga A, Lissi E. 2000. A comparison of methods employed to evaluate antioxidant capabilities. *Biological Research*.33:71-77.
- Prior RL. 2015. Oxygen radical absorbance capacity (ORAC): New horizons in relating dietary antioxidants/bioactives and health benefits. *Journal of Functional Foods*.18:797-810.

- Qiang L, Luo F, Zhao X, Liu Y, Hu G, Sun C, Li X, Chen K. 2015. Identification of Proanthocyanidins from Litchi (*Litchi chinensis* Sonn.) Pulp by LC-ESI-QTOF- MS and Their Antioxidant Activity. *PLoS ONE*.10.
- Re R, Pellegrini N, Proteggente A, Pannala A, Yang M, Rice-Evans C. 1999. Antioxidant activity applying an improved ABTS radical cation decolorization assay. *Free Radical Biology and Medicine*.26:1231-1237.
- Sanchez-Rabaned F, O. J, Lamuela-Raventos RM, Bastida J, Viladomat F, Codina C. 2003. Identification of phenolic compounds in artichoke waste by highperformance liquid chromatography–tandem mass spectrometry. *Journal of Chromatography A*.1008:57–72.
- Schaich KM, Tian X, Xie J. 2015. Reprint of “Hurdles and pitfalls in measuring antioxidant efficacy: A critical evaluation of ABTS, DPPH, and ORAC assays”. *Journal of Functional Foods*.18:782-796.
- Seeram NP, Henning SM, Niu Y, Lee R, Scheuller HS, Heber D. 2006. Catechin and caffeine content of green tea dietary supplements and correlation with antioxidant capacity. *Journal of Agricultural and Food Chemistry*.54:1599-1603.
- Shahidi F, Zhong Y. 2015. Measurement of antioxidant activity. . *Journal of Functional Foods*.18:757-781.
- Silva EM, Souza JNS, Rogez H, Rees JF, Larondelle Y. 2007. Antioxidant activities and polyphenolic contents of fifteen selected plant species from the Amazonian region. *Food Chemistry*.101:1012-1018.
- Singleton VL, Rossi JA. 1965. Colorimetry of total phenolics with phosphomolybdic– phosphotungstic acid reagents. *The American Journal of Enology and Viticulture*.16:144-158.
- Stintzing F, Herbach K, Mosshammer M, Carle R, Yi W, Sellappan S, Akoh CC, Bunch R, Felker P. 2005. Color, betalain pattern, and antioxidant properties of cactus pear (*Opuntia* spp.) clones. *Journal of Agricultural and Food Chemistry*.53:442-451.
- Tabart J, Kevers C, Pincemail J, Defraigne JO, Dommes J. 2009. Comparative antioxidant capacities of phenolic compounds measured by various tests. *Food Chemistry*.113:1226-1233.
- Wang CC, Chu CY, Chu JO, Choy KW, Khaw KS, Rogers MS, Pang CP. 2004. Trolox-equivalent antioxidant capacity assay versus oxygen radical absorbance capacity assay in plasma. *Clinical Chemistry*.50:952-954.
- Wu C, Xu H, Héritier J, Andlauer W. 2012. Determination of catechins and flavonol glycosides in Chinese tea varieties. *Food Chemistry*.132:144–149.
- Wu X, Beecher GR, Holden JM, Haytowitz DB, Gebhardt SE, Prior RL. 2004. Lipophilic and Hydrophilic Antioxidant Capacities of Common Foods in the United State. *Journal of Agricultural and Food Chemistry*.52:4026-4037.
- Zulueta A, Esteve MJ, Frígola A. 2009. ORAC and TEAC assays comparison to measure the antioxidant capacity of food products. *Food Chemistry*.114:310-316.
